# Supplementary material for: Infrared nanospectroscopy depth-dependent study of modern materials: morpho-chemical analysis of polyurethane/fibroin binary meshes
Source: Royal Society of Chemistry journal article supplement (doi:10.1039/d3an00336a), 2023-01-01
Supplement: d3an00336a1.odt [file d3an00336a1.odt]

Supplementary Information

Infrared nanospectroscopy depth-dependent study of modern materials: morpho-chemical analysis of polyurethane/fibroin binary meshes

Sara Cappelletti1**, Alice Caldiroli2**, Giovanni Birarda3, Alberto Redaelli4, Stefania Adele Riboldi1, Chiaramaria Stani5, Lisa Vaccari3 and Federica Piccirilli3*

1 Bioengineering Laboratories (Cantù, Italy)
2 Dialybrid Srl (Cantù, Italy)
3 Elettra Sincrotrone Trieste (Trieste, Italy)
4 Politecnico di Milano (Milano, Italy)
5 CERIC-ERIC, Trieste (Trieste, Italy)
** these authors contributed equally
*corresponding author: federica.piccirilli@elettra.eu


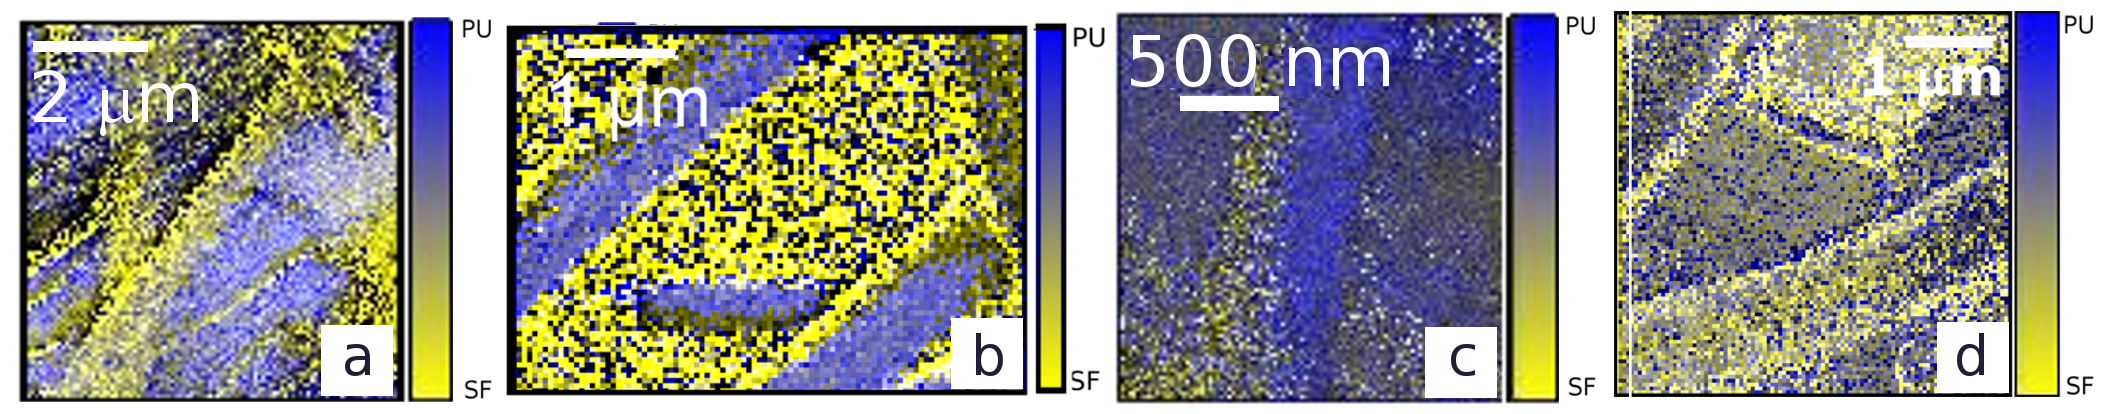
Figure S1: IR s-SNOM imaging of SFPU-1w and SFPU-2w. Far field scattering corrected (O3-O2) maps calculated  according to [1] on maps reported at Figure 5 and 6, respectively of SFPU-2w and SFPU-1w. The maps were obtained through maps subtraction as follow: (a) 5d-5c, (b) 5h-5g, (c) 6d-6c and (d) 6g-6h. The maps here shown are, according to the theory, free from indirect illumination and edge artifacts. Indeed, while the near field signal at different harmonics depends on the penetration depth, far field and edge effects equally affect all the harmonics of the phase. Thus, by subracting the higher harmonic to the lower it is possible to obtain maps free from indirect illumination and edge artifacts. However, the combination of different harmonics can be used to interpret near-field signals only for homogenous samples since lower harmonics are more penetrating than higer, i.e. they contain informations on deeper volumes of the sample below the tip. In the present study the application of this procedure was nevertheless useful to identify the pixels in the map that are more affected by unwanted scattering. The evidence of the scattering suppression can be easily checked by comparing the maps here reported to the maps shown at Figure 5 (c,d) and Figure 6 (c,d).

References
[1] L. Mester, A. A. Govyadinov and R. Hillenbrand, Nano Lett. 2022, 11, 377–390.
